# Supplementary material
Source: PubMed Central journal article supplement (PMC4135824)
Supplement: AAC.02875-14_zac009143228so1.pdf [file AAC.02875-14_zac009143228so1.pdf]

**Table S1** Details of *Phialophora verrucosa* strains used in this study

| Strain Number | Source                          | Geography      | Genbank No. of ITS |
|---------------|---------------------------------|----------------|--------------------|
| BMU 02757     | Phaeohyphomycosis; skin         | Northern China | KF971724           |
| BMU 07163     | Phaeohyphomycosis; skin         | Northern China | KF971725           |
| BMU 04480     | Chromoblastomycosis; face       | Northern China | KF971726           |
| BMU 03356     | Chromoblastomycosis; hand       | Eastern China  | KF971727           |
| BMU 01926     | Phaeohyphomycosis; ear          | Northern China | KF971728           |
| BMU 07454     | Phaeohyphomycosis; face         | Eastern China  | KF971729           |
| BMU 04928     | Phaeohyphomycosis; back         | Northern China | KF971730           |
| BMU 02669     | Chromoblastomycosis; skin       | Southern China | KF971731           |
| BMU 01276     | Chromoblastomycosis; skin       | Unknown        | KF971732           |
| BMU 03344     | Phaeohyphomycosis; ear          | Northern China | KF971733           |
| BMU 01245     | Chromoblastomycosis; skin       | China          | KF971734           |
| BMU 05960     | Phaeohyphomycosis; skin         | Northern China | KF971735           |
| BMU 03979     | Phaeohyphomycosis; lymph node   | Northern China | KF971736           |
| BMU 02323     | Chromoblastomycosis; skin       | China          | KF971737           |
| BMU 03082     | Chromoblastomycosis; skin       | Eastern China  | KF971738           |
| BMU 01843     | Phaeohyphomycosis; ear          | Northern China | KF971739           |
| BMU 06170     | Phaeohyphomycosis; skin         | Unknown        | KF971740           |
| BMU 01246     | Chromoblastomycosis; skin       | Northern China | KF971741           |
| BMU 01845     | Phaeohyphomycosis; ear          | Northern China | KF971742           |
| BMU 01244     | Chromoblastomycosis; skin       | Japan          | KF971743           |
| BMU 02758     | Phaeohyphomycosis; skin         | Northern China | KF971744           |
| BMU 00848     | Phaeohyphomycosis; ear          | Northern China | KF971745           |
| BMU 00849     | Chromoblastomycosis; skin       | Eastern China  | KF971746           |
| BMU 00512     | Phaeohyphomycosis; ear          | Northern China | KF971747           |
| BMU 07066     | Chromoblastomycosis; upper limb | Northern China | KF971759           |
| BMU 07346     | Phaeohyphomycosis; upper limb   | Eastern China  | KF971760           |
| BMU 07506     | Phaeohyphomycosis; leg          | Eastern China  | KF971761           |
| BMU 01890     | Chromoblastomycosis; skin       | Southern China | KF971765           |
| BMU 07678     | Phaeohyphomycosis; leg          | Northern China | KJ701008           |
| BMU 07676     | Phaeohyphomycosis; face         | Southern China | KJ701006           |
| BMU 07677     | Phaeohyphomycosis; face         | Southern China | KJ701007           |
| BMU 00125     | Bark of Jiamusi                 | Northern China | KF971748           |
| BMU 00441     | Stem of Hainan                  | Southern China | KF971749           |
| BMU 05998     | Soil of patient's garden        | Northern China | KF971750           |
| BMU 05996     | Bark of patient's garden        | Northern China | KF971751           |
| BMU 04541     | Leaf of Changbaishan            | Northern China | KF971752           |
| BMU 00131     | Deadwood of Beijing             | Northern China | KF971766           |
| BMU 06000     | Soil of patient's garden        | Northern China | KF971753           |
| BMU 00132     | Wheat of Jiamusi                | Northern China | KF971754           |

|           |                          |                |          |
|-----------|--------------------------|----------------|----------|
| BMU 00127 | Bark of Hainan           | Southern China | KF971755 |
| BMU 05997 | Soil of patient's garden | Northern China | KF971756 |
| BMU 00447 | Bark of Zhanjiang        | Southern China | KF971757 |
| BMU 04493 | Soil of Lushuihe         | Northern China | KF971758 |
| BMU 04507 | Bark of Lushuihe         | Northern China | KF971762 |
| BMU 04522 | Leaf of Lushuihe         | Northern China | KF971763 |
| BMU 00121 | Leaf of Jiamusi          | Northern China | KF971764 |

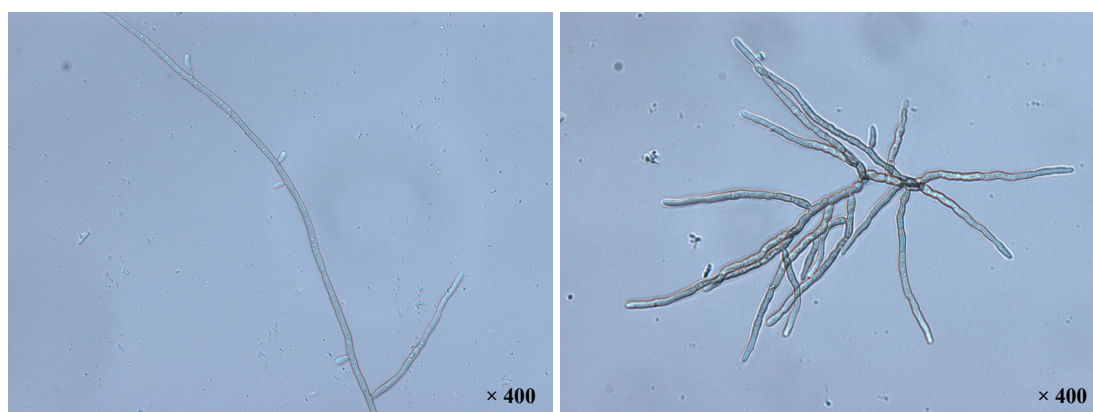

A: BMU 07163, caspofungin 2  $\mu\text{g}/\text{ml}$

B: BMU 07163, caspofungin 4  $\mu\text{g}/\text{ml}$

**Fig. S1** The growth morphology of hyphal under different concentrations of caspofungin. A, when caspofungin was 2  $\mu\text{g}/\text{ml}$ , the hyphal grow healthy; B, when caspofungin was 4  $\mu\text{g}/\text{ml}$ , the hyphal appeared wrinkled, short and increasing in branch.
